# Supplementary material
Source: PubMed Central journal article supplement (PMC3307656)
Supplement: supp_P022905_jlr.P022905-1.pdf [file supp_P022905_jlr.P022905-1.pdf]

Supplemental Table 1. Expression of inflammatory genes and angiotensinogen in abdominal subcutaneous, epiploic, and omental fat of obese, insulin sensitive individuals. The expression of genes in abdominal subcutaneous fat is arbitrarily set at 1.

| Gene             | Subcutaneous | Epiploic | Omental |
|------------------|--------------|----------|---------|
| CCL5             | 1            | 2.9      | 1.4     |
| CD4 <sup>+</sup> | 1            | 6.3      | 2.4     |
| CD8 <sup>+</sup> | 1            | 2.5      | 2.5     |
| Angiotensinogen  | 1            | 5.6      | 3.7     |

Supplemental Table 2. List of genes used for custom PCR array study

| <b>Gene name (ALL HUMAN)</b> | <b>Symbol</b> | <b>Ref SeqNo.</b> |
|------------------------------|---------------|-------------------|
| TNF $\alpha$                 | TNF           | NM_000594         |
| IL1 $\beta$                  | IL 1b         | NM_000576         |
| IL6                          | IL6           | NM_000600         |
| IFN $\gamma$                 | IFNg          | NM_000619         |
| IL-10                        | IL 10         | NM_000572         |
| IL-4                         | IL 4          | NM_000589         |
| IL-13                        | IL 13         | NM_002188         |
| IL18                         | IL 18         | NM_001562         |
| CCL-2                        | CCL2          | NM_002982         |
| CCR2                         | CCR2          | NM_000648         |
| CCL-3                        | CCL3          | NM_002983         |
| PPAR $\gamma$                | PPARG         | NM_015869         |
| CCL-5                        | CCL5          | NM_002985         |
| CD68                         | CD68          | NM_001251         |
| MPO                          | MPO           | NM_000250         |
| CD4                          | CD4           | NM_000616         |
| CD8                          | CD8A          | NM_001768         |
| PGC1 $\alpha$                | PPARGC1a      | NM_013261         |
| PGC1 $\beta$                 | PPARGC1b      | NM_133263         |
| Catalase                     | CAT           | NM_001752         |
| SOD1                         | SOD1          | NM_000454         |
| SOD2                         | SOD2          | NM_000636         |
| Thioredoxin                  | TXN           | NM_003329         |
| SIRT1                        | SIRT1         | NM_012238         |
| SIRT3                        | SIRT3         | NM_012239         |
| Nampt                        | Nampt         | NM_005746         |
| AMPK $\alpha$ 1              | PRKAA1        | NM_006251         |
| AMPK $\alpha$ 2              | PRKAA2        | NM_006252         |
| LKB1                         | STK11         | NM_000455         |
| p53                          | Tp53          | NM_000546         |
| PTP1b                        | PTPN1         | NM_002827         |
| HIF-1 $\alpha$               | HIF1a         | NM_001530         |
| Adiponectin                  | ADIPOQ        | NM_004797         |
| Leptin                       | LEP           | NM_000230         |
| VCAM1                        | VCAM1         | NM_001078         |
| PECAM1                       | PECAM1        | NM_000442         |
| AGT                          | AGT           | NM_000029         |
| P-selectin                   | SELP          | NM_003005         |
| MMP9                         | MMP9          | NM_004994         |
| iNOS                         | NOS2          | NM_000625         |
| eNOS                         | NOS3          | NM_000603         |
| VEGF                         | VEGFA         | NM_003376         |
| PAI-1                        | SERPINE1      | NM_000602         |

| <b>House-keeping genes</b> | Symbol  | Ref SeqNo. |
|----------------------------|---------|------------|
| 18S                        | 18SrRNA | X03205     |
| Cyclophilin A              | PPIA    | NM_021130  |

---

Abbreviations: PTP-1b, protein tyrosine phosphatase-1b; TNF $\alpha$ , tumor necrosis factor  $\alpha$ ; PPAR $\gamma$ , peroxisome proliferator-activated receptor gamma; PGC1 $\alpha$ , peroxisome proliferator-activated receptor gamma coactivator 1-alpha; CCL5, chemokine (C-C motif) ligand 5; CD68, cluster of differentiation 68; MPO, myeloperoxidase; Nampt, nicotinamide phosphoribosyltransferase; PAI-1, plasminogen activator inhibitor 1.
